# Supplementary figures and images for: Using Tumor-Informed Circulating Tumor DNA (ctDNA)-Based Testing for Patients with Anal Squamous Cell Carcinoma
Source: PubMed Central journal article supplement — Oncologist. 2022 Dec 23;28(3):220–9. doi: 10.1093/oncolo/oyac249 (PMC10020810; doi:10.1093/oncolo/oyac249), 2022-12-23

Stage I-III

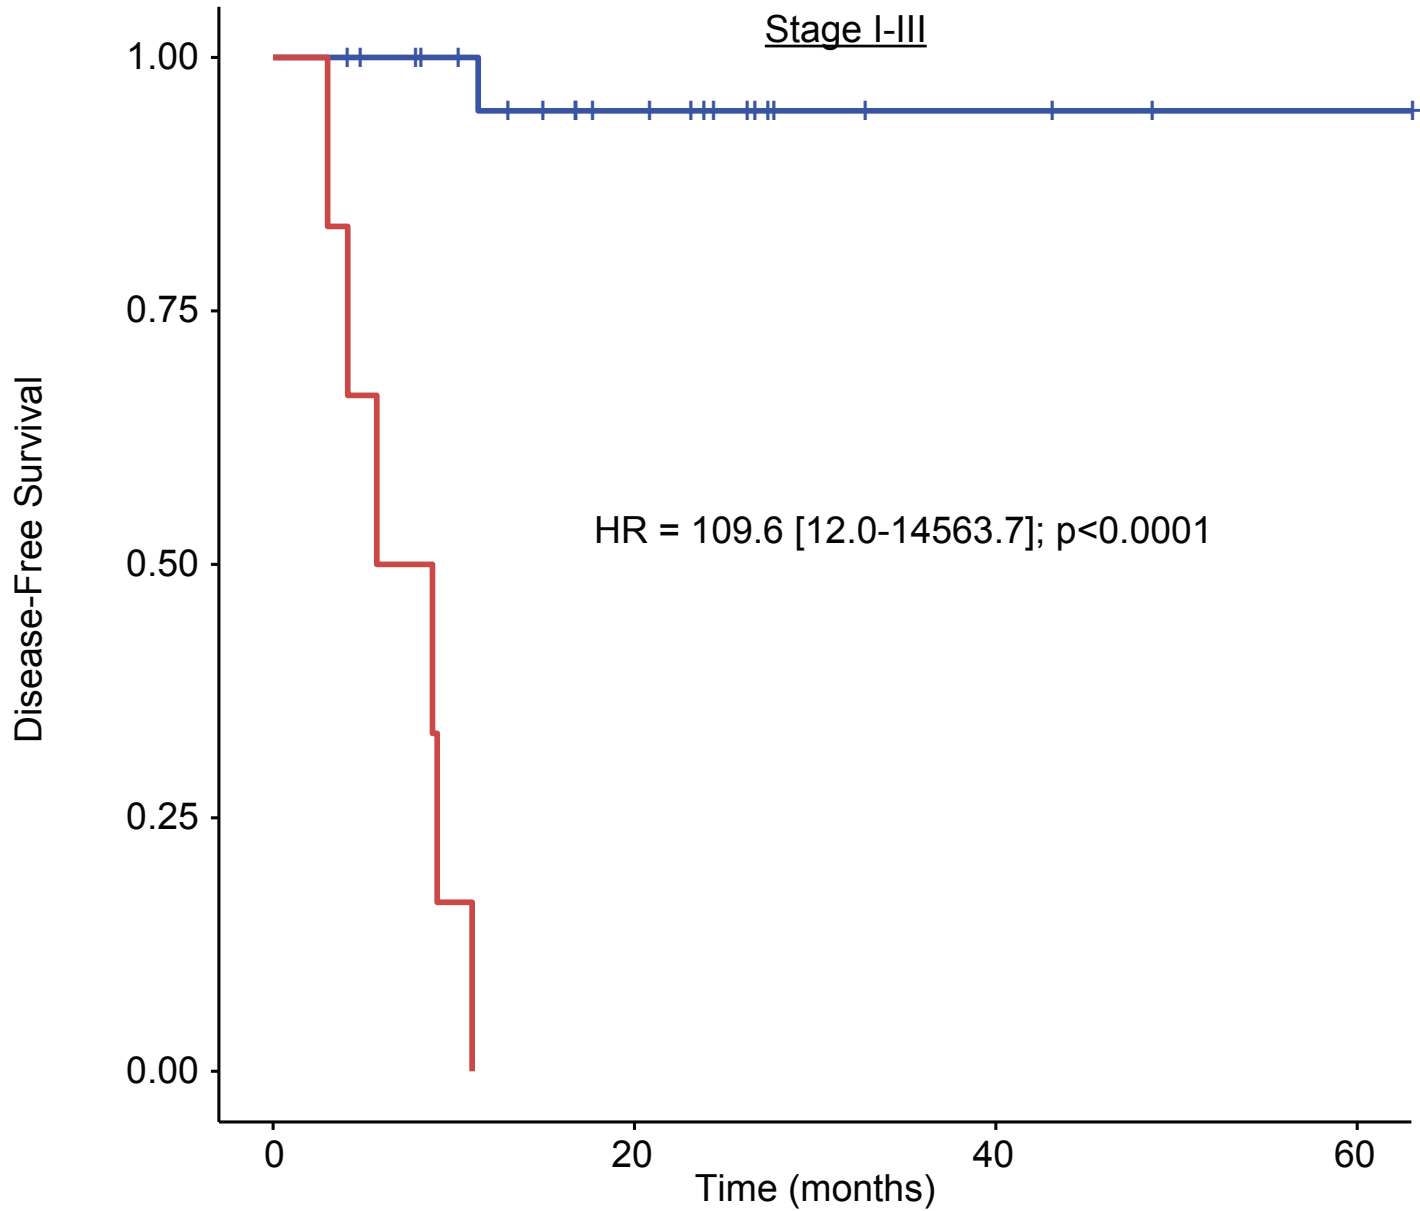

Number at risk

ctDNA-negative 24

13

4

2

ctDNA-positive 6

0

0

0

Supplement: oyac249_suppl_supplementary_figure_s1.pdf [file oyac249_suppl_supplementary_figure_s1.pdf]
